# Supplementary figures and images for: Consequences of the combined loss of BOK and BAK or BOK and BAX
Source: PubMed Central journal article supplement — Cell Death Dis. 2013 Jun 6;4(6):e650–. doi: 10.1038/cddis.2013.176 (PMC3698543; doi:10.1038/cddis.2013.176), 2013-06-06

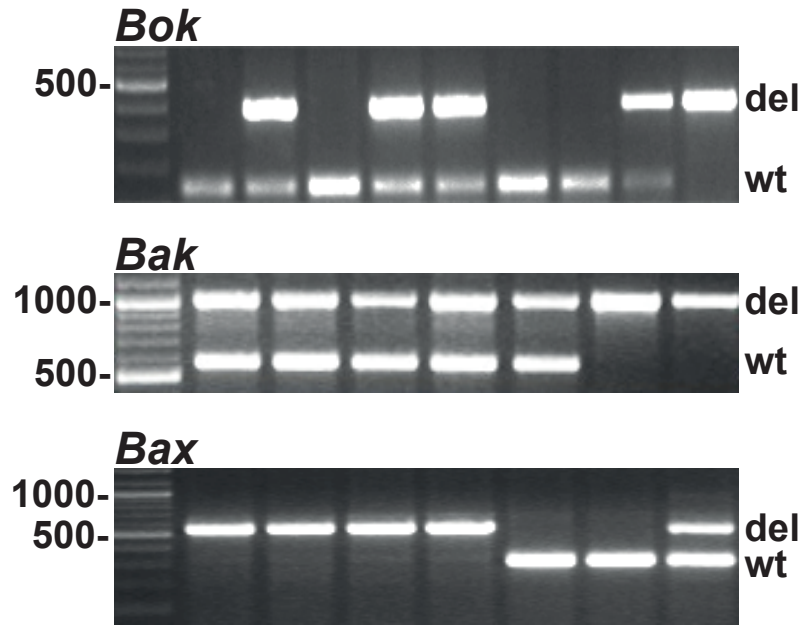

Supplement: cddis2013176x1.pdf [file cddis2013176x1.pdf]

a) Thymus

9-14 weeks

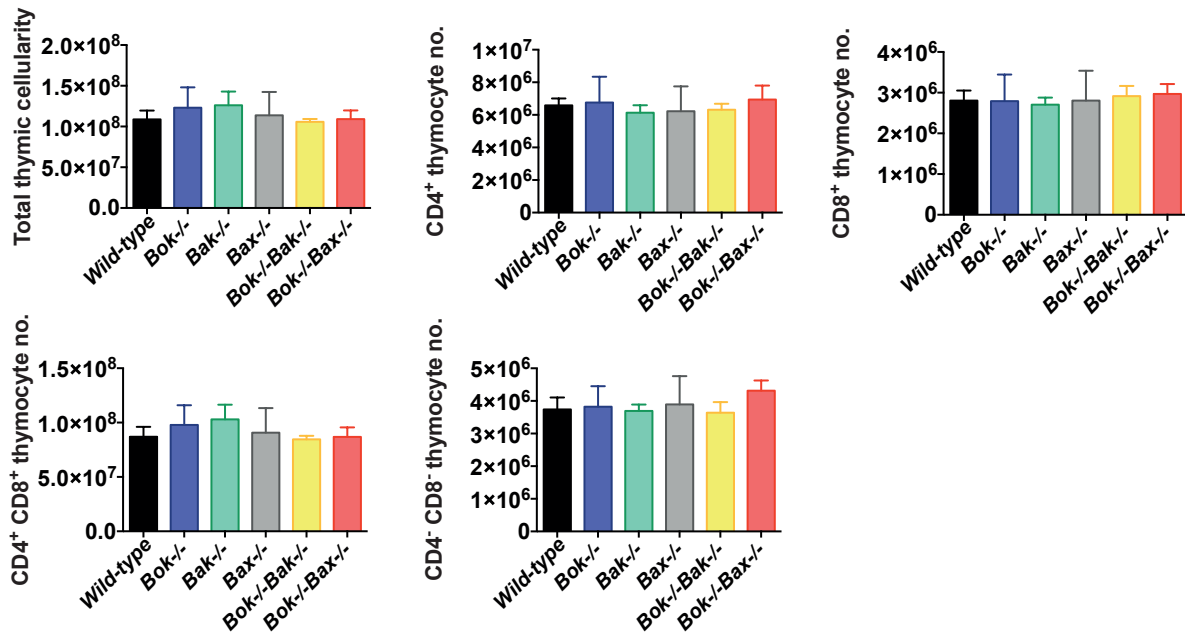

b) Spleen

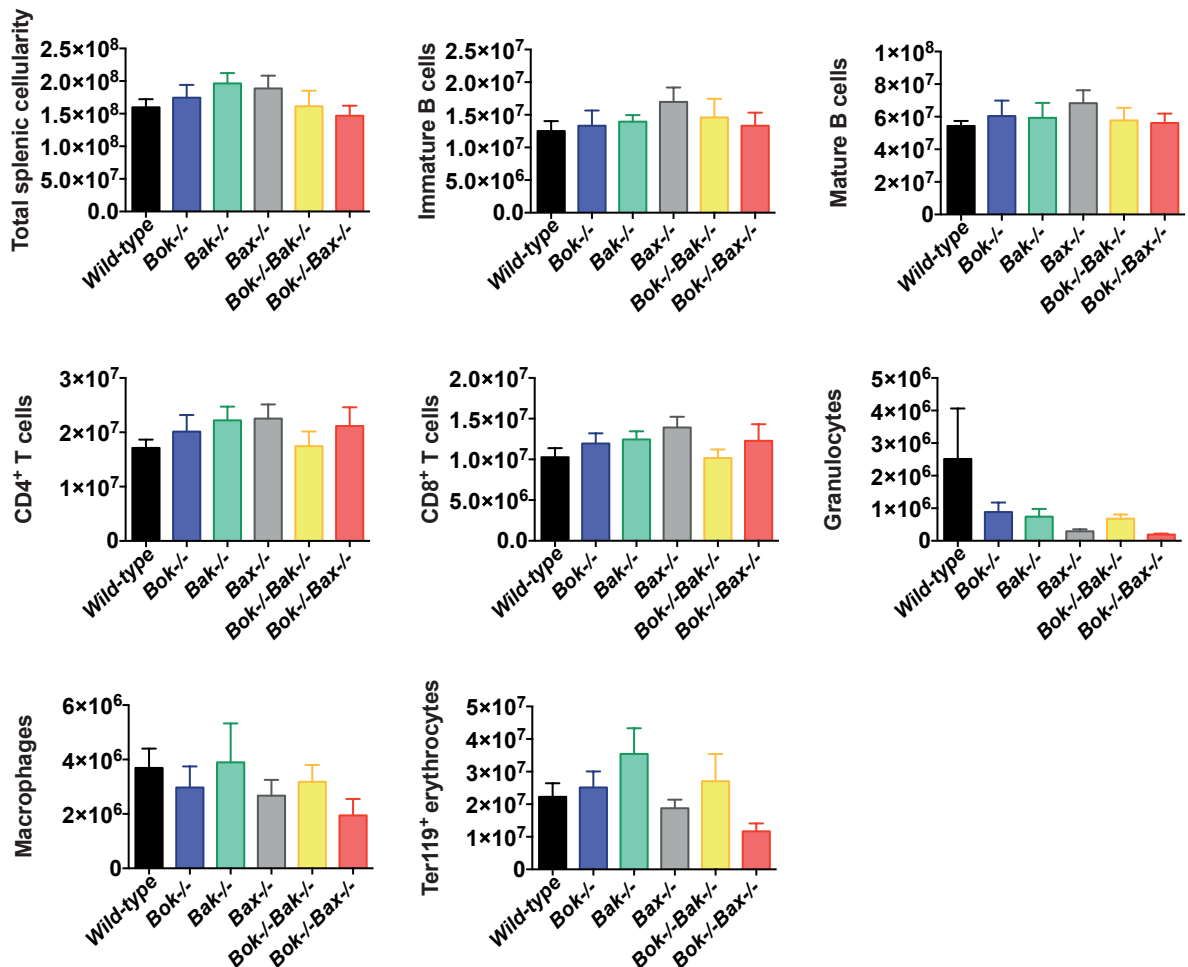

Supplement: cddis2013176x2.pdf [file cddis2013176x2.pdf]

c) Bone marrow

9-14 weeks

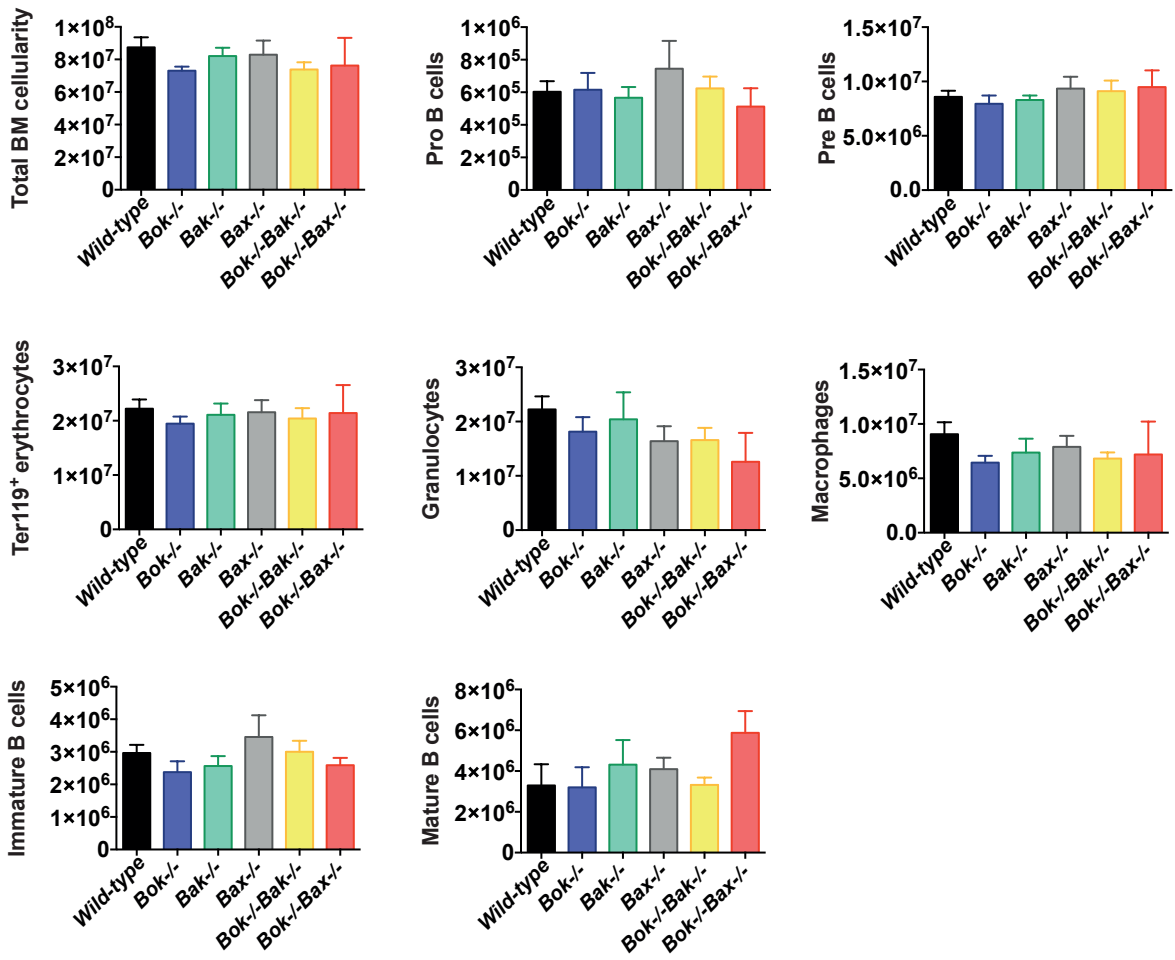

d) Peripheral blood

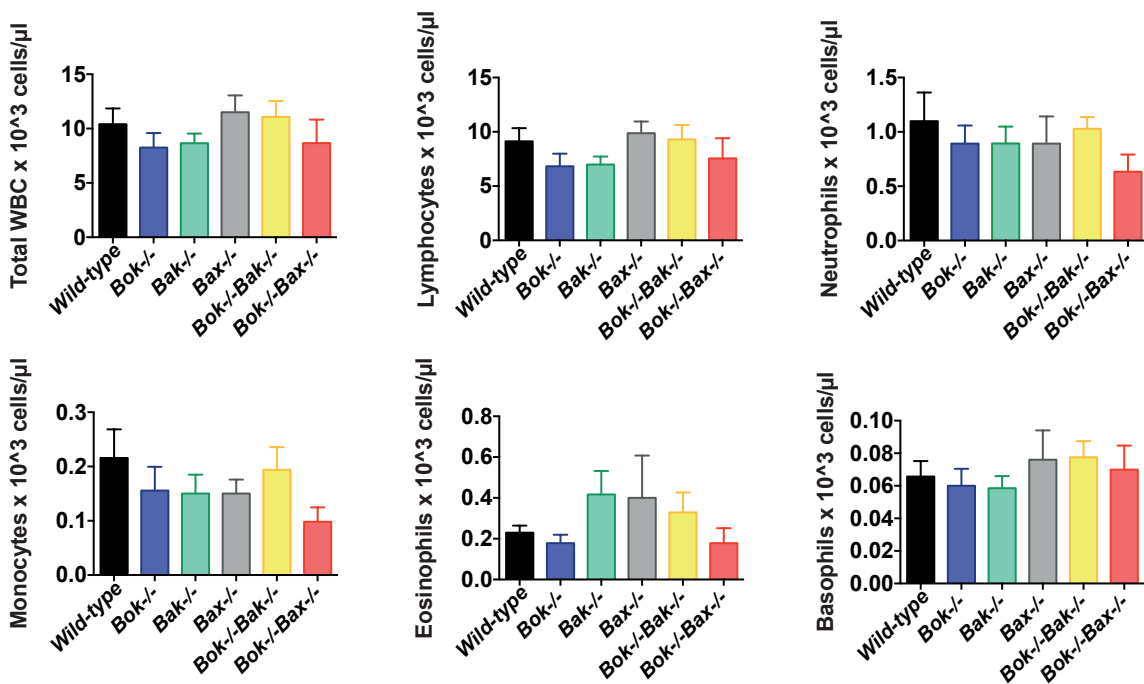

Supplement: cddis2013176x3.pdf [file cddis2013176x3.pdf]

## a) Female

1 year

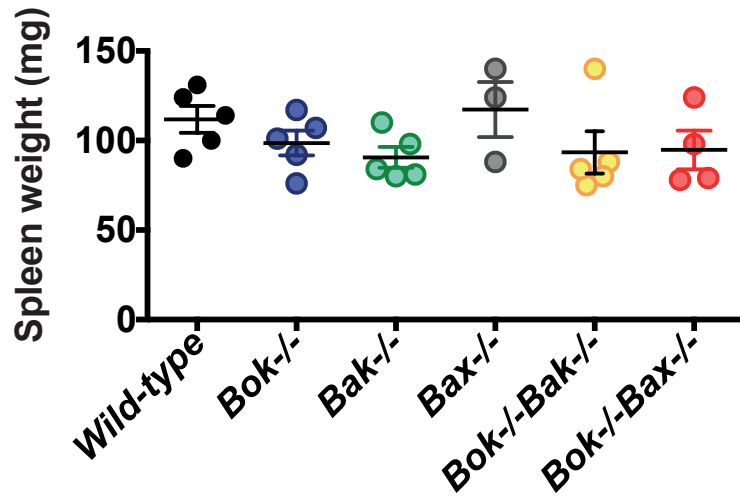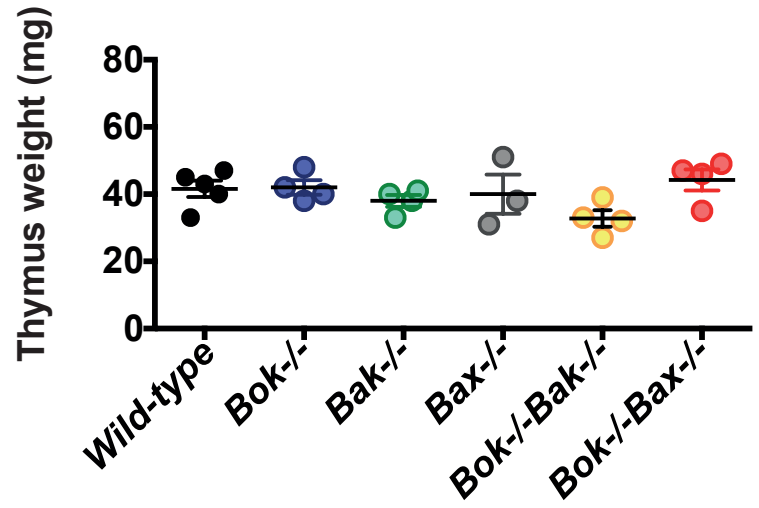

## b) Male

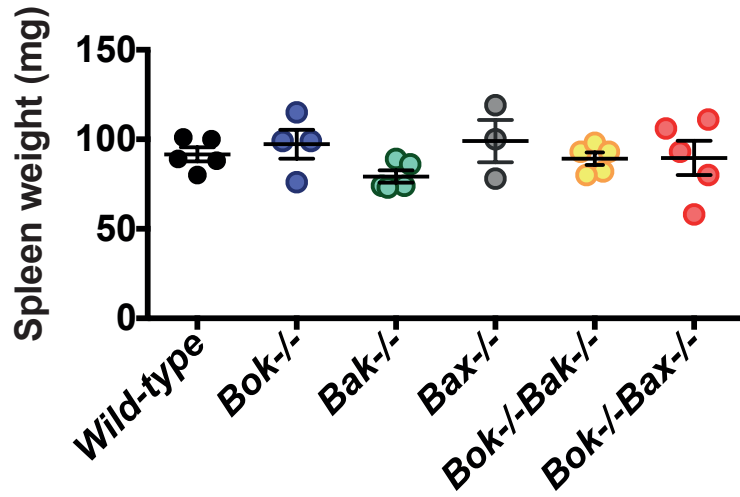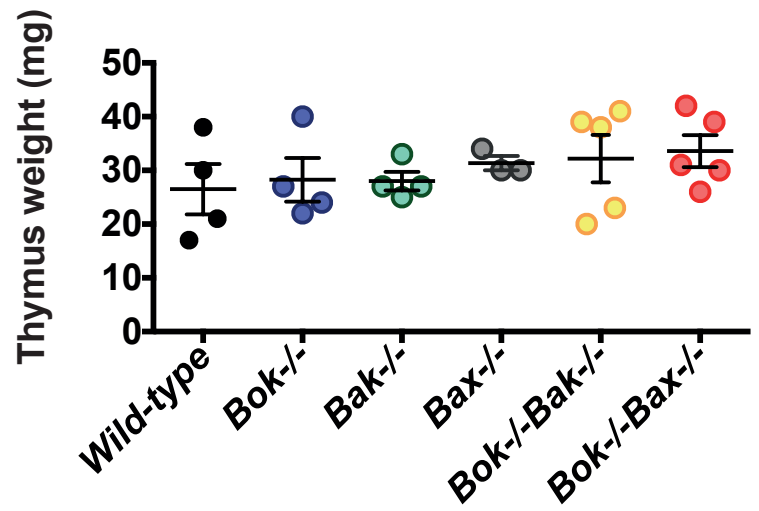

Supplement: cddis2013176x4.pdf [file cddis2013176x4.pdf]

a) Thymus

1 year

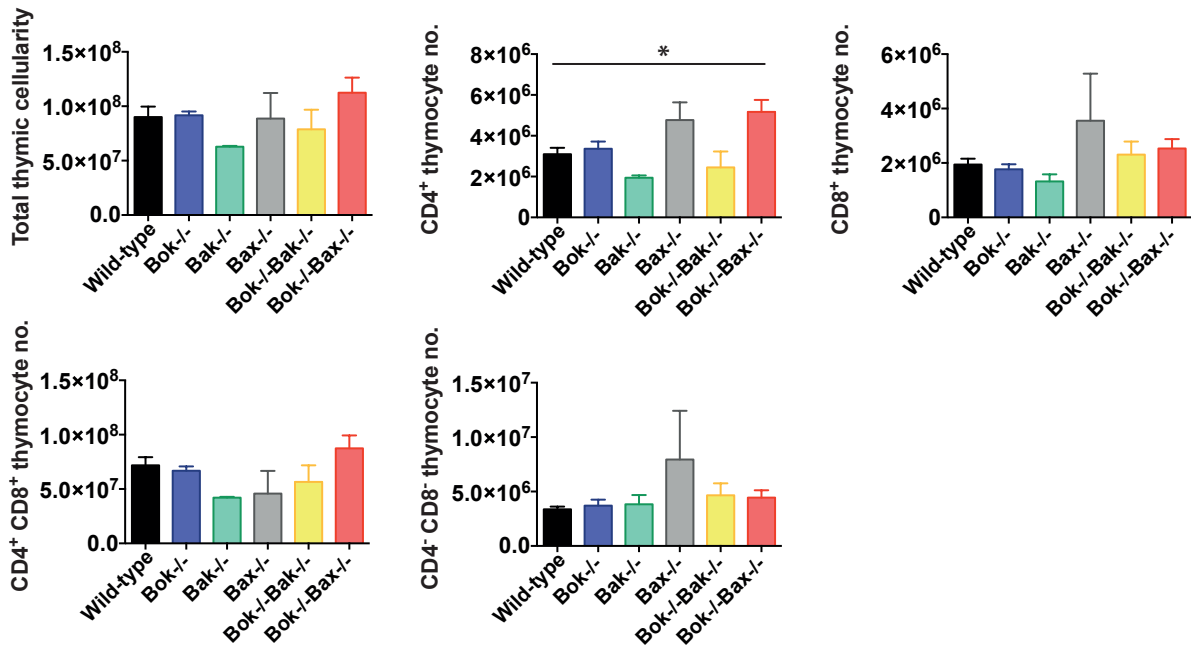

b) Spleen

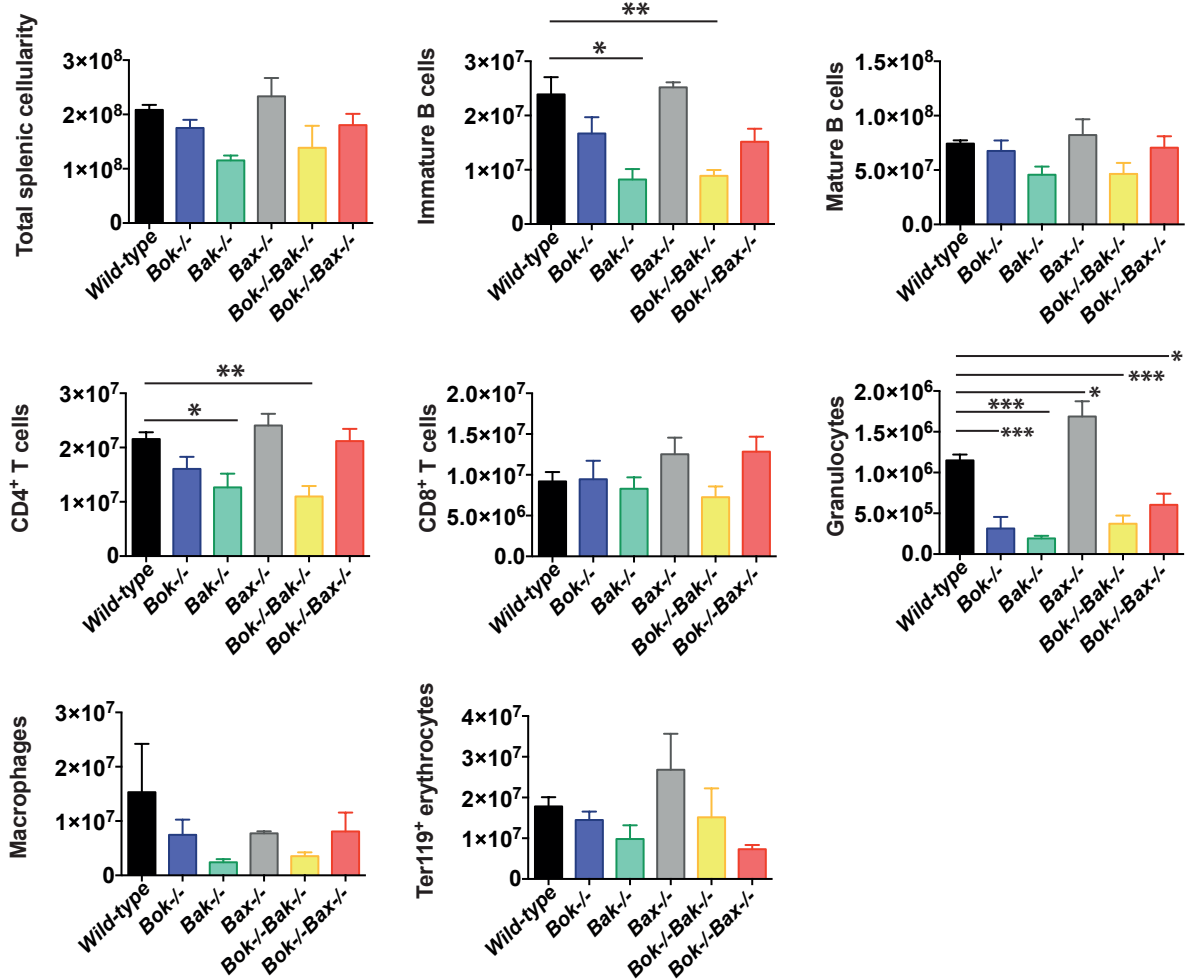

Supplement: cddis2013176x5.pdf [file cddis2013176x5.pdf]

c) Bone marrow

1 year

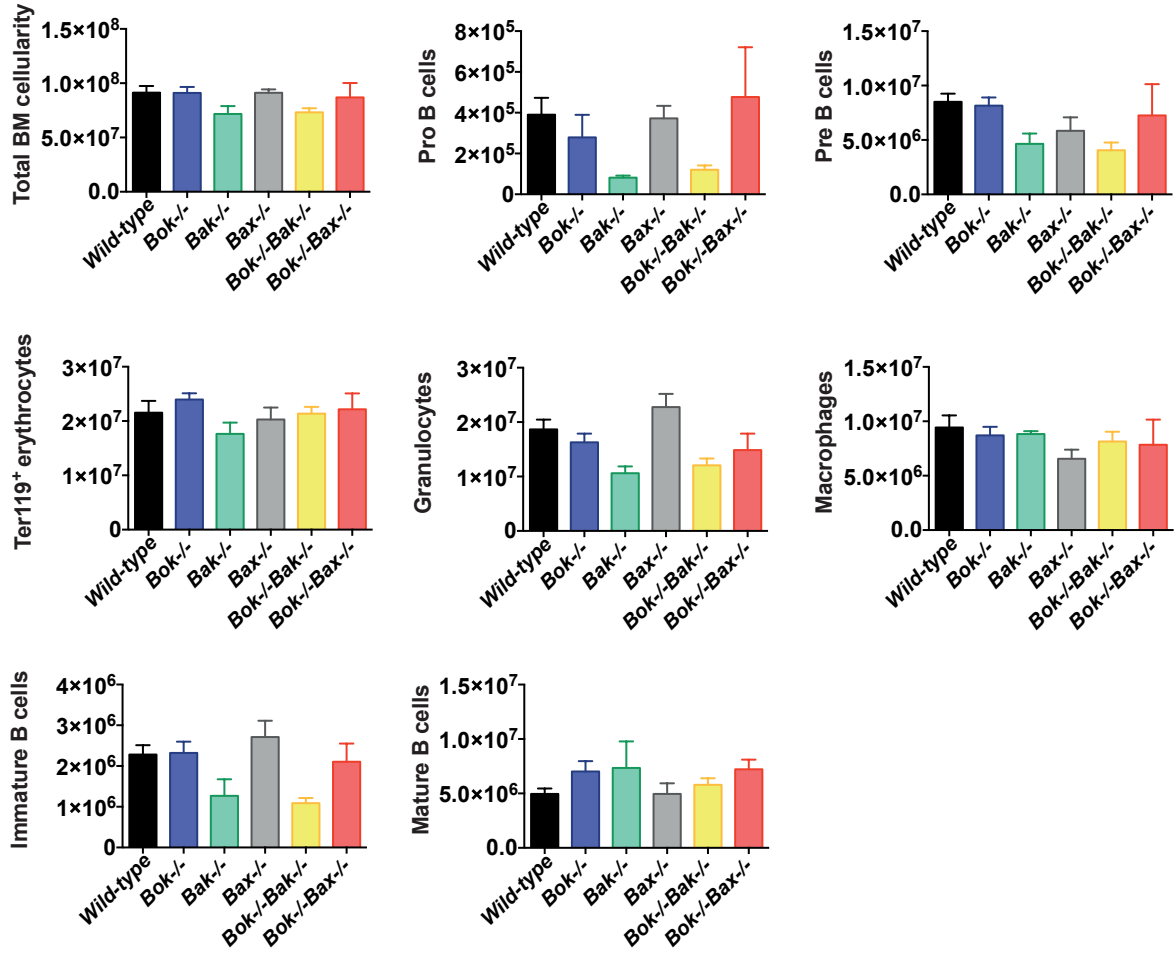

d) Peripheral blood

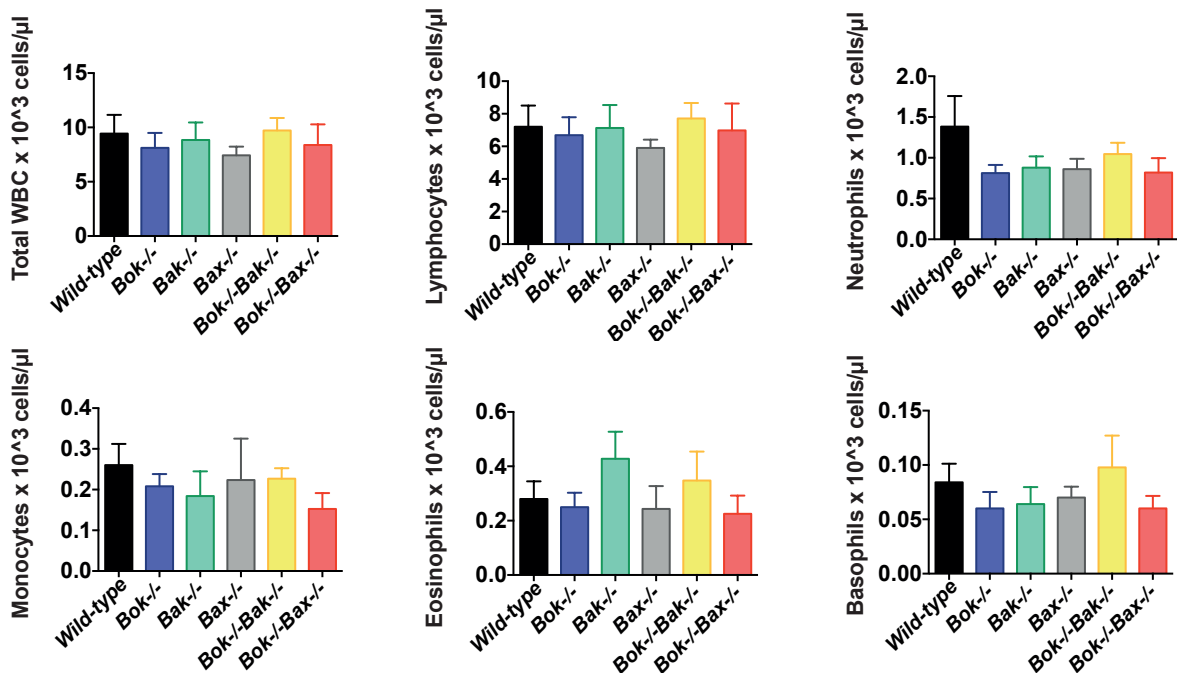

Supplement: cddis2013176x6.pdf [file cddis2013176x6.pdf]

a) Thymus

1 year

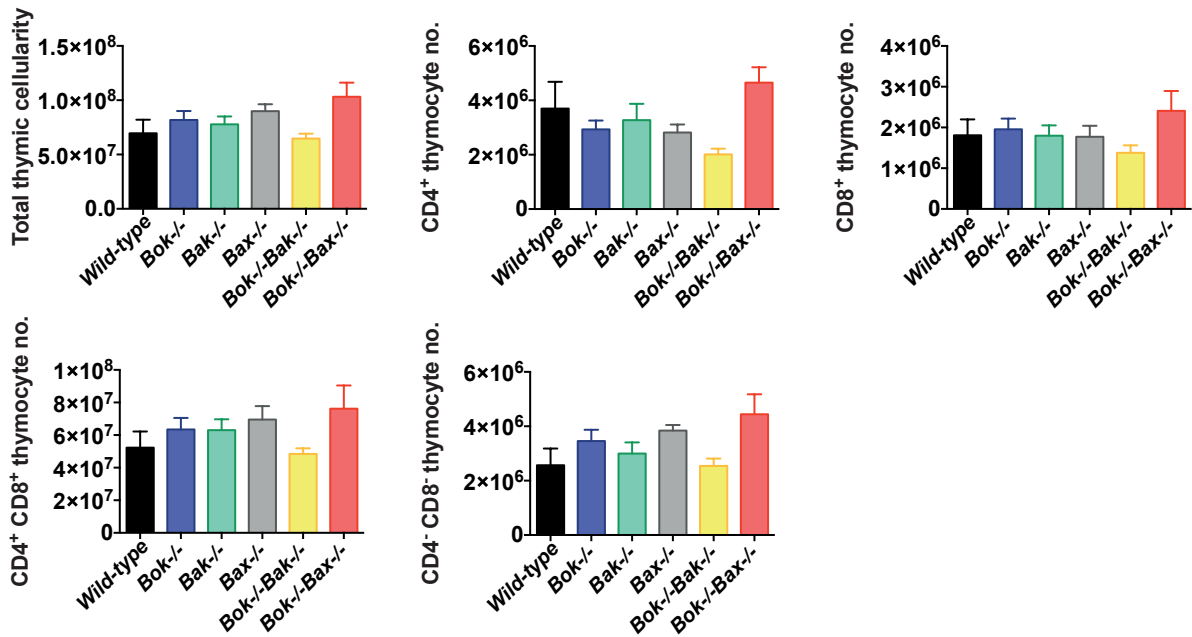

b) Spleen

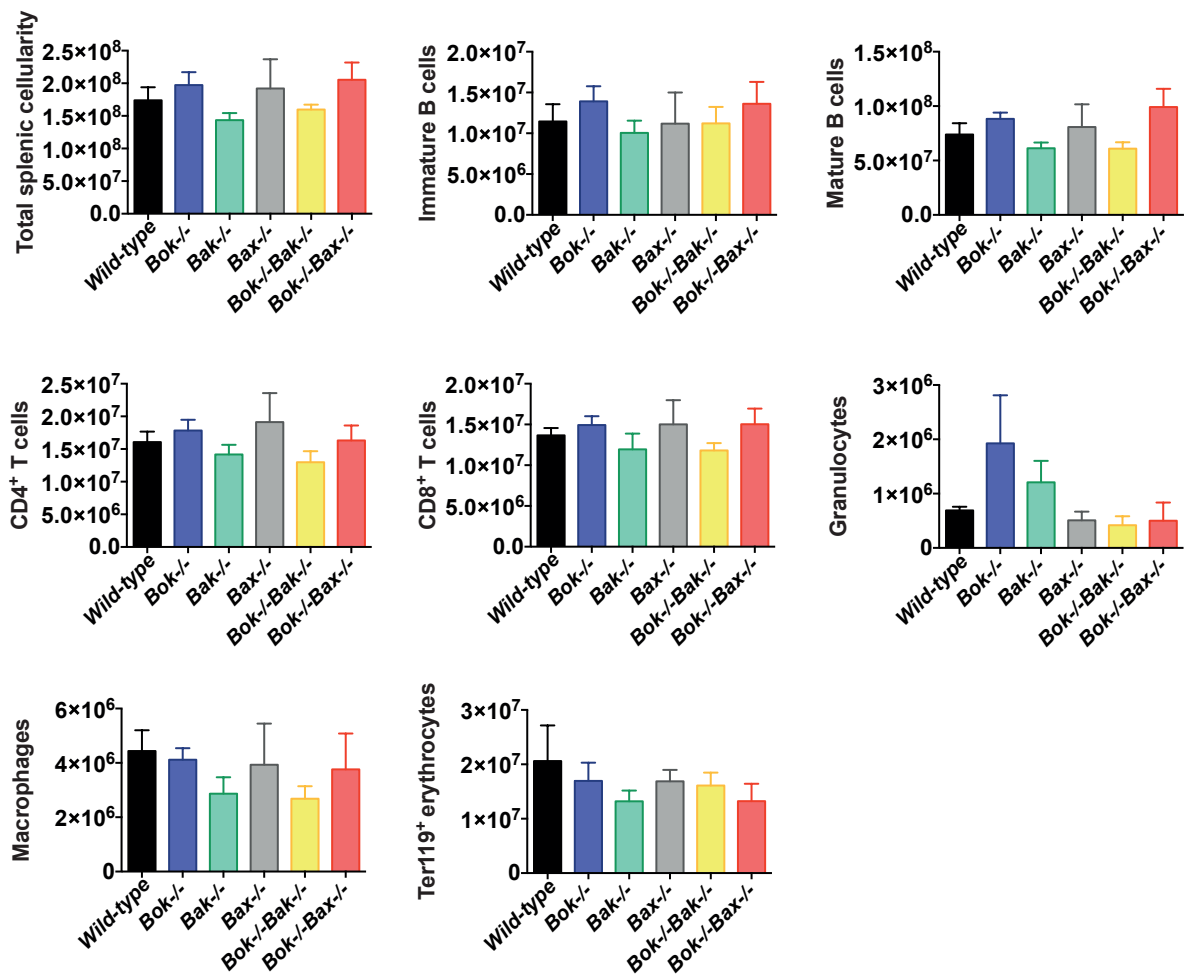

Supplement: cddis2013176x7.pdf [file cddis2013176x7.pdf]

c) Bone marrow

1 year

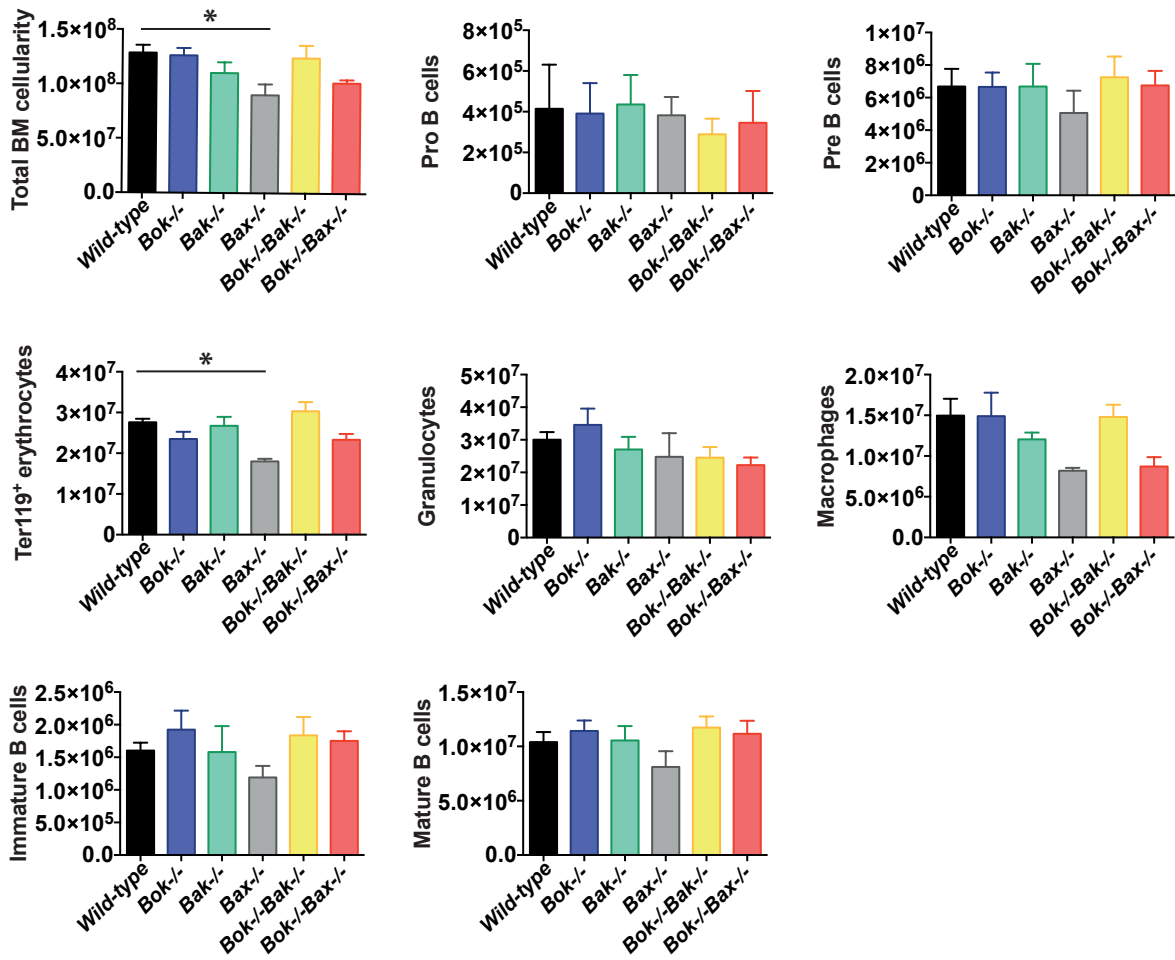

d) Peripheral blood

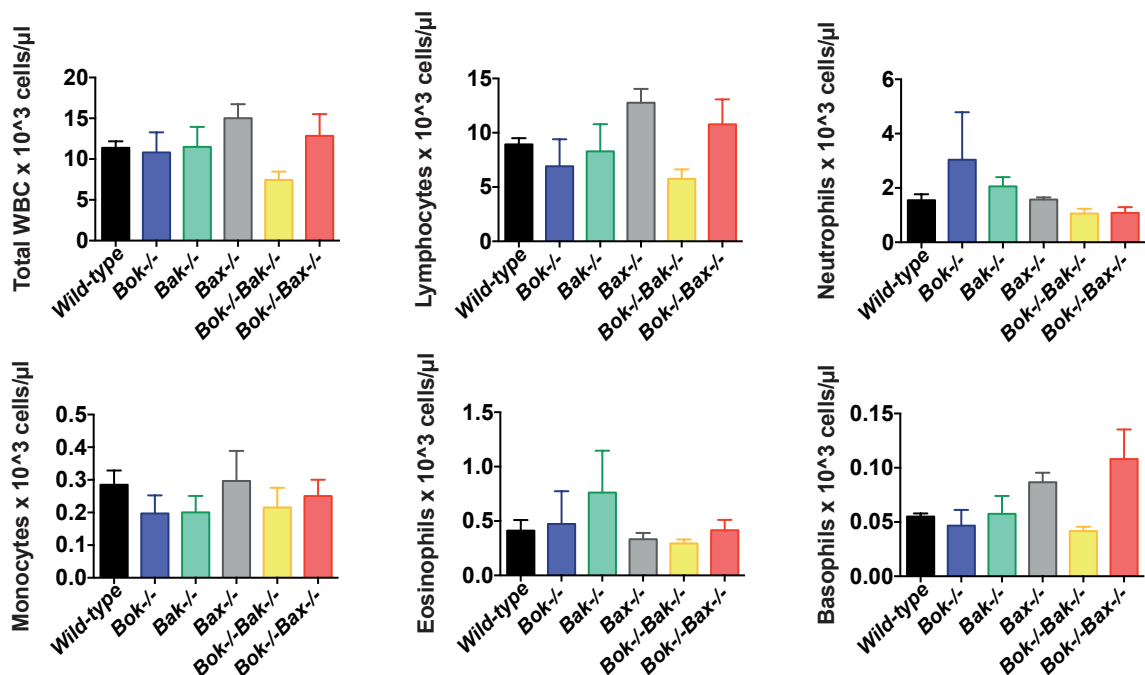

Supplement: cddis2013176x8.pdf [file cddis2013176x8.pdf]

CD4+CD8+ thymocytes

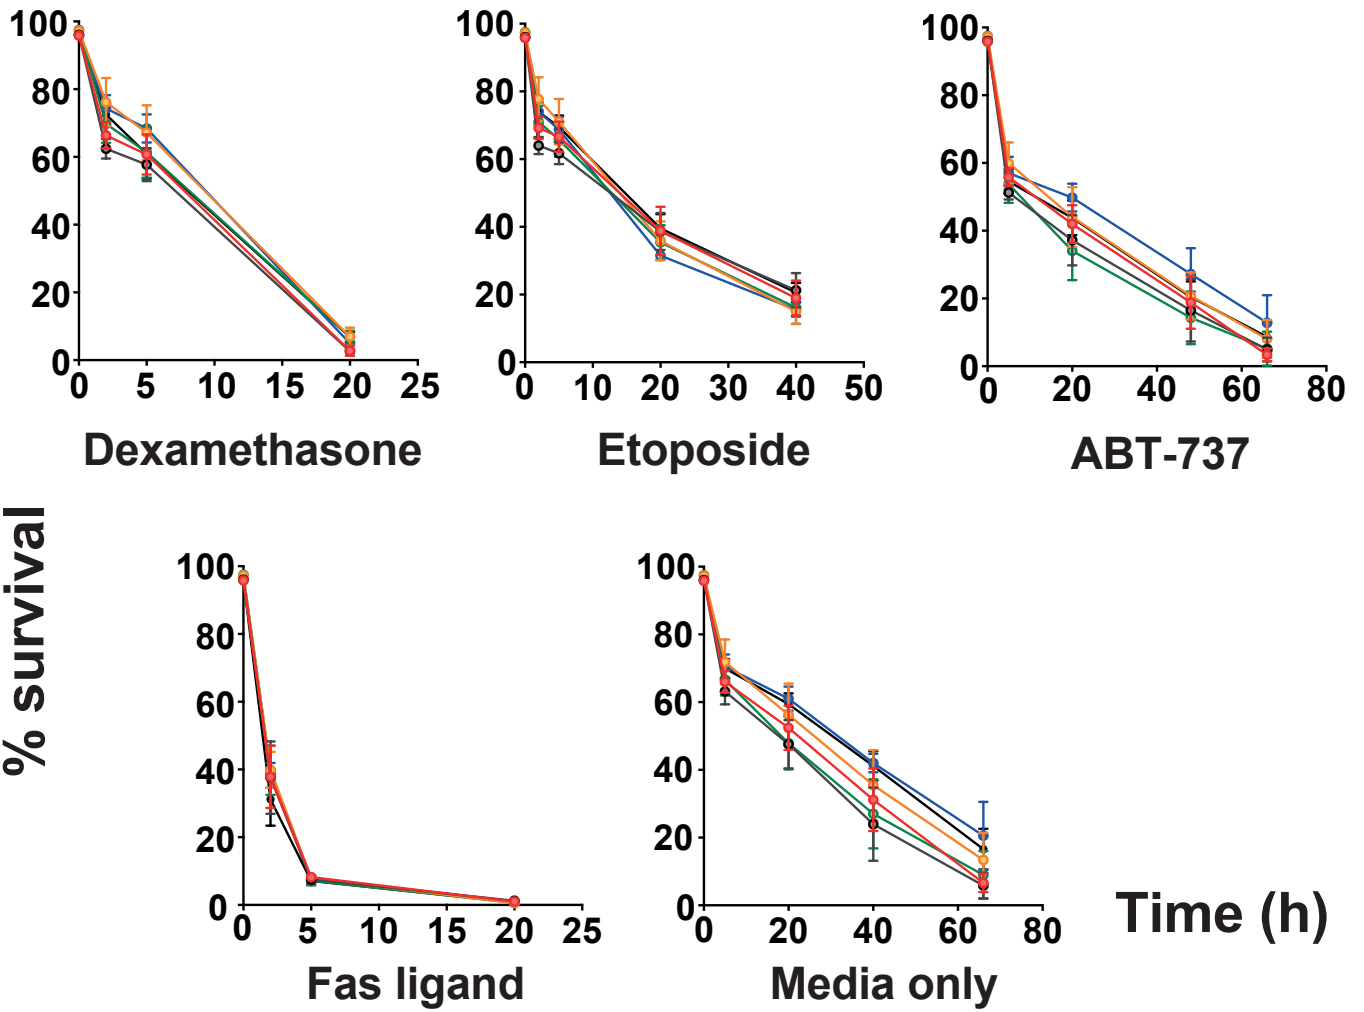

- Wild-type
- Bok-/-
- Bak-/-
- Bax-/-
- Bok-/-Bak-/-
- Bok-/-Bax-/-

Supplement: cddis2013176x9.pdf [file cddis2013176x9.pdf]
